# Supplementary material
Source: PubMed Central journal article supplement (PMC3124565)
Supplement: NIHMS295133-supplement-01.pdf [file NIHMS295133-supplement-01.pdf]

Supplemental Table 1

**Colon crypt lengths, colonic MPO activities and liver mass in WT and TNFR1<sup>-/-</sup> mice infected with *C. rodentium*.**

\*, significantly different from uninfected control, P<0.05

| Treatment Groups                  | Crypt Lengths<br>( $\mu\text{m}$ ) | MPO Activity<br>(U/g colon) | Liver Mass<br>(g) |
|-----------------------------------|------------------------------------|-----------------------------|-------------------|
| Wild-type, Uninfected             | 177.46 $\pm$ 5.06                  | 0.37 $\pm$ 0.11             | 0.8 $\pm$ 0.03    |
| Wild-type, Infected               | 212.23 $\pm$ 9.36*                 | 0.77 $\pm$ 0.22             | 0.93 $\pm$ 0.04*  |
| TNFR1 <sup>-/-</sup> , Uninfected | 173.53 $\pm$ 6.63                  | 0.28 $\pm$ 0.05             | 0.8 $\pm$ 0.03    |
| TNFR1 <sup>-/-</sup> , Infected   | 252.39 $\pm$ 19.47*                | 0.70 $\pm$ 0.08*            | 1.15 $\pm$ 0.03*  |

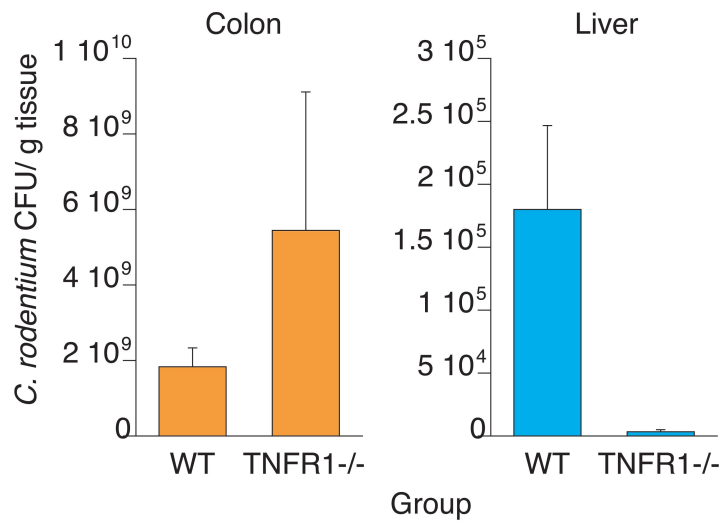

Supplemental Fig. 1. *C.rodentium* cells in the livers and colons of infected WT and TNFR<sup>-/-</sup> mice. Mice were treated as described in Fig. 2.

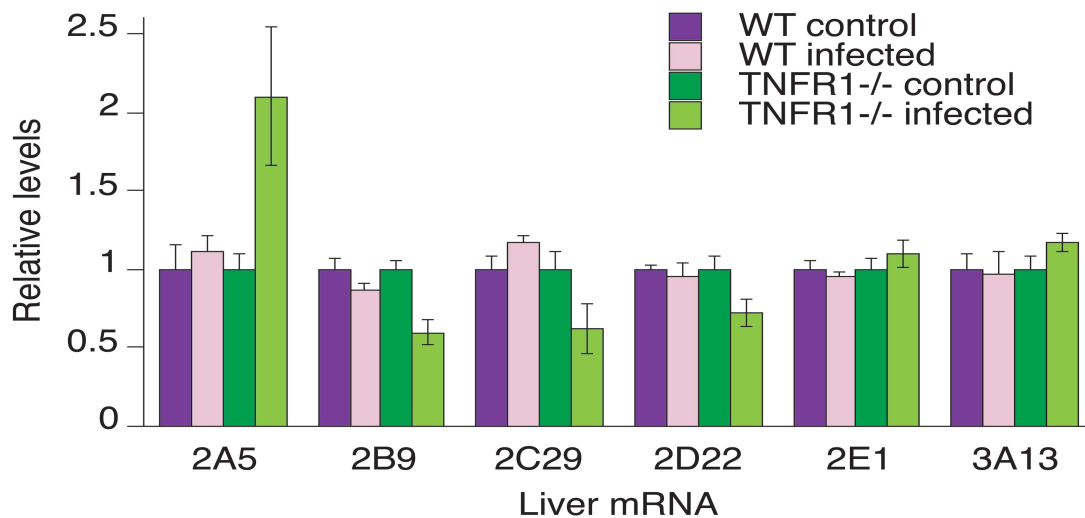

Supplemental Fig. 2. CYP mRNAs that were not affected by *C. rodentium* infection in either mouse genotype. Mice were treated as described in Fig. 2.

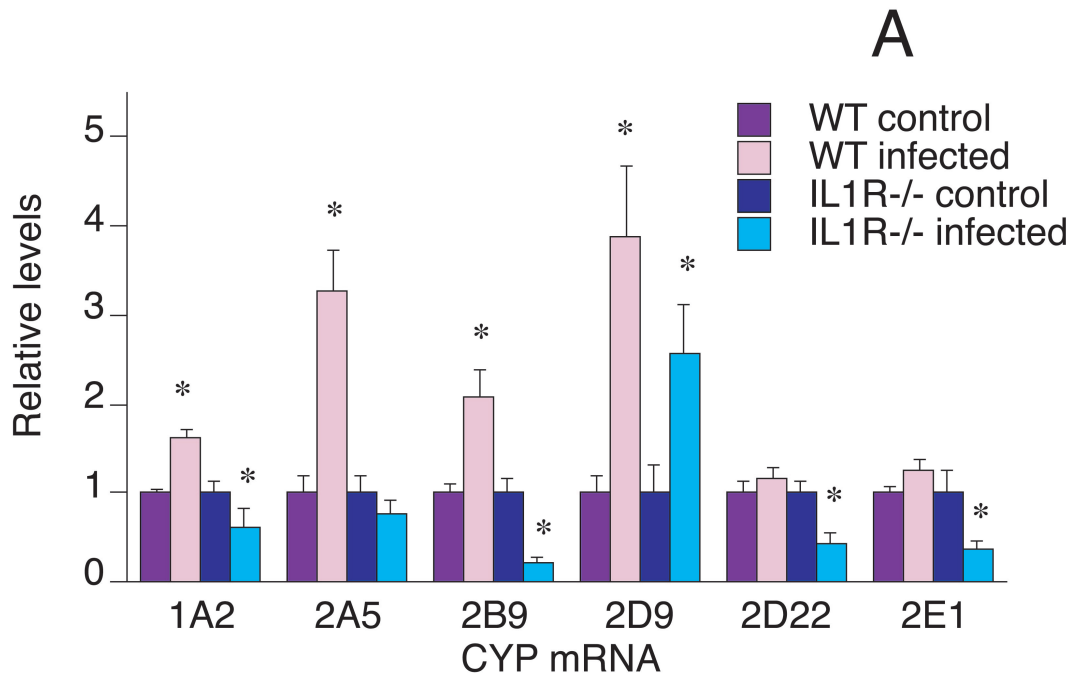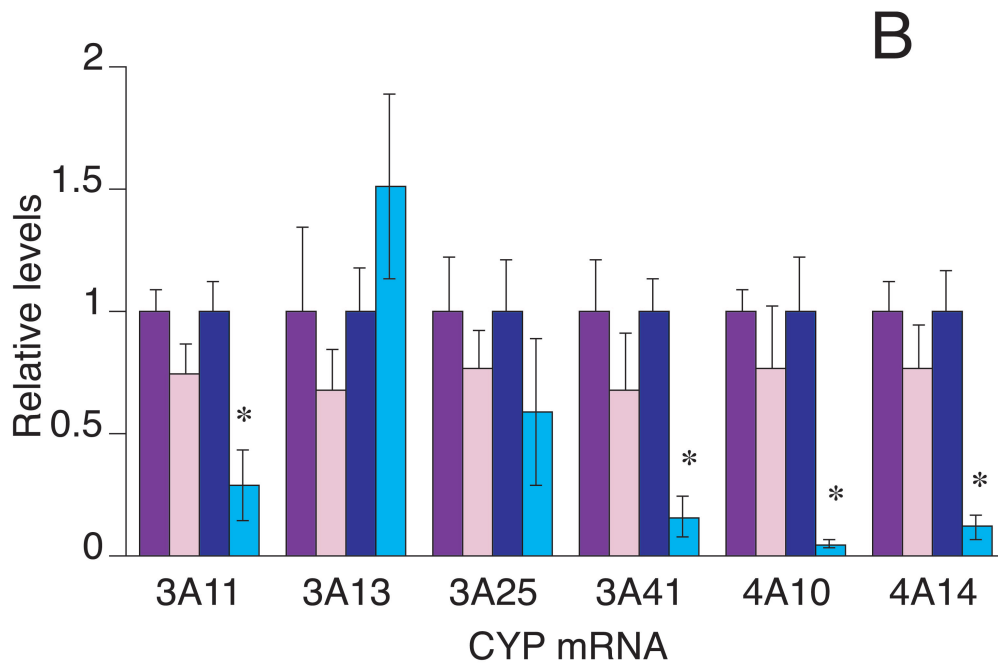

Supplemental Fig. 3. Regulation of CYP mRNAs by *C. rodentium* infection in IL1R<sup>-/-</sup> mice. Mice were orally infected with *C. rodentium*, and livers were harvested 7 days later for measurement of P450 mRNA levels as described under Materials and Methods. Values represent means  $\pm$  S.E.M. of 6 mice per group. \*,  $P < 0.05$  compared with control group of same genotype. Differences between groups were determined by Student's *t* test.

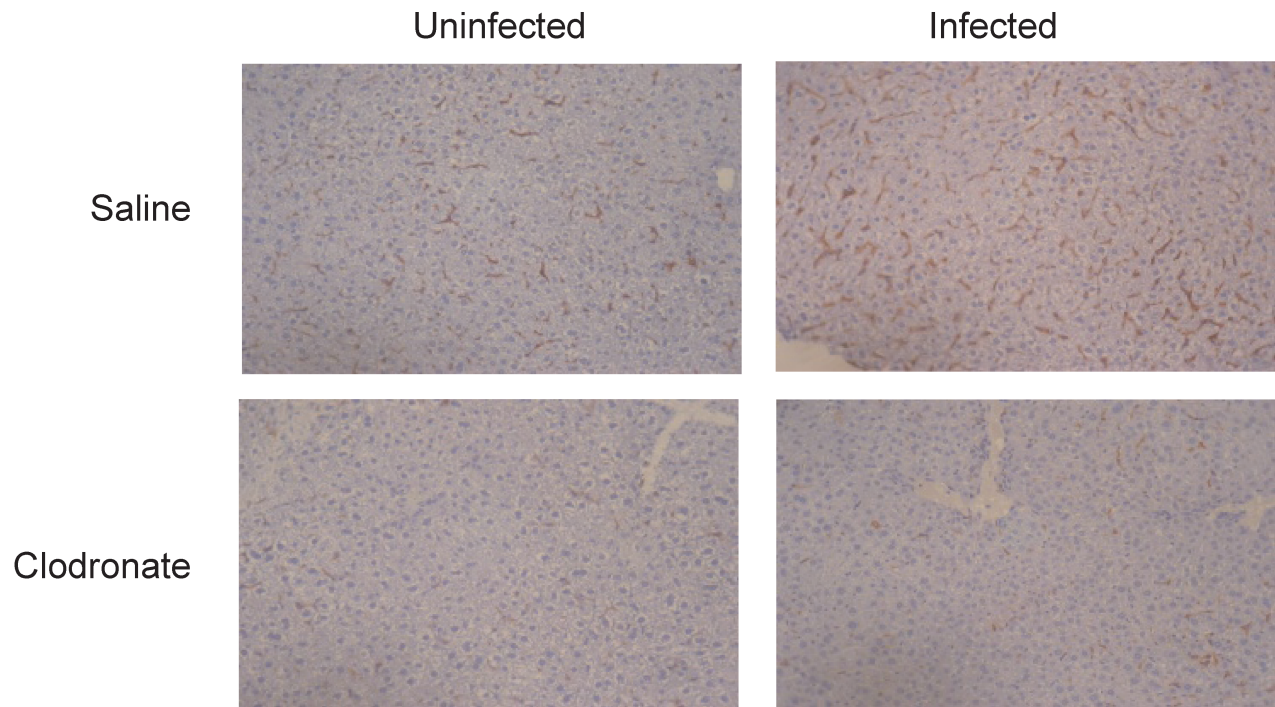

Supplemental Fig. 4. Immunohistochemical analysis of Kupfer cells in livers of clodronate-treated mice. Mice were treated as described in Fig. 6. Liver sections were stained with F4/80 antibody, and micrographs from a representative mouse of each group are shown. Positive cells are stained brown in the figure. The saline injected, uninfected mice represent a healthy population expressing a normal level of Kupffer cells.

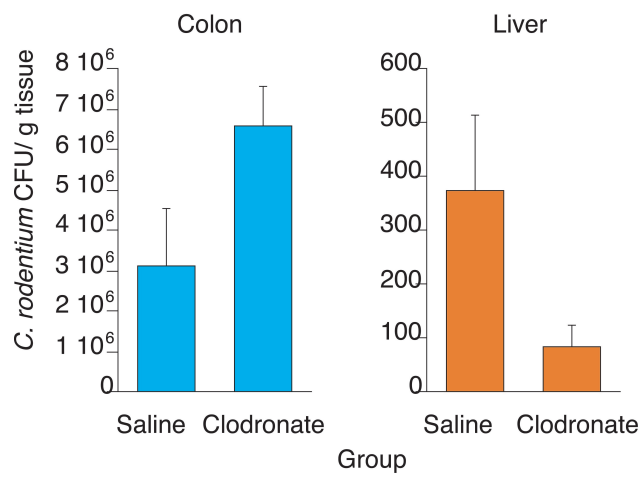

Supplemental Fig 5. *C.rodentium* cells in the livers and colons of infected saline- and clodronate-treated mice
